# Supplementary material for: Introducing Cyanodorina gen. nov. and Cyanodorina ovale sp. nov. (Microcystaceae, Chroococcales), a Novel Coccoid Cyanobacterium Isolated from Caohai Lake in China Based on a Polyphasic Approach
Source: MDPI journal article supplement (doi:10.3390/d15030329), 2023-02-23
Supplement: s1 [file s1]

Table S1. – List of all strains examined in this study, with NCBI Genbank accession numbers.

| Clade              | Name                            | Strian          | NCBI GenBank Accession |
|--------------------|---------------------------------|-----------------|------------------------|
| <i>Microcystis</i> | <i>Microcystis aeruginosa</i>   | NIES298         | CP046058               |
|                    | <i>Microcystis flosaquae</i>    | NRERC215        | MK557925               |
|                    | <i>Microcystis wesenbergii</i>  | NRERC212        | MK972442               |
|                    | <i>Microcystis flosaquae</i>    | NRERC211        | MK589721               |
|                    | <i>Microcystis wesenbergii</i>  | NIES112         | U40334                 |
|                    | <i>Microcystis panniformis</i>  | 2B3             | MG984606               |
|                    | <i>Microcystis aeruginosa</i>   | MDEG1           | MG979399               |
|                    | <i>Microcystis aeruginosa</i>   | SERB52          | KP890774               |
|                    | <i>Microcystis wesenbergii</i>  | SERB24          | KM982573               |
|                    | <i>Microcystis orissica</i>     | SERB10          | KM982559               |
|                    | <i>Microcystis stagnalis</i>    | SERB21          | KM982570               |
|                    | <i>Microcystis panniformis</i>  | SERB3           | KM982552               |
|                    | <i>Microcystis ichthyoblabe</i> |                 | AB012339               |
|                    | <i>Microcystis aeruginosa</i>   | LEGE91343       | KF287005               |
|                    | <i>Microcystis panniformis</i>  | G11             | MG984608               |
|                    | <i>Microcystis flosaquae</i>    | TAUMAC1510      | MN062678               |
|                    | <i>Microcystis panniformis</i>  | FACHB1757       | CP011339               |
|                    | <i>Microcystis panniformis</i>  | VN354           | AB666074               |
|                    | <i>Microcystis aeruginosa</i>   | PCC7005 SAG1450 | KM019996               |
|                    | <i>Microcystis aeruginosa</i>   | CHAB1452        | KJ818173               |
|                    | <i>Microcystis novacekii</i>    | TAC65           | AB012337               |
|                    | <i>Microcystis aeruginosa</i>   | NIES1123        | LC557449               |
|                    | <i>Microcystis ichthyoblabe</i> | NRERC208        | MK972440               |
|                    | <i>Microcystis smithii</i>      | CHAB1459        | GQ496079               |
|                    | <i>Microcystis aeruginosa</i>   | LMECYA147       | KC311975               |
|                    | <i>Microcystis aeruginosa</i>   | UWOCCMR D       | AF139324               |
|                    | <i>Microcystis ichthyoblabe</i> | NRERC217        | MK972443               |
|                    | <i>Microcystis aeruginosa</i>   | SAG17.85        | KM019998               |
|                    | <i>Microcystis flosaquae</i>    | CHAB4369        | KJ818196               |
|                    | <i>Microcystis viridis</i>      | CHAB534         | KJ818182               |
|                    | <i>Microcystis ichthyoblabe</i> | CHAB181         | KJ818188               |
|                    | <i>Microcystis aeruginosa</i>   | PMC256          | KF287004               |
|                    | <i>Microcystis flosaquae</i>    | UWOCCC3         | AF139329               |
|                    | <i>Microcystis aeruginosa</i>   | NIVACYA123      | KF286991               |
|                    | <i>Microcystis panniformis</i>  | CENA121         | KP835526               |
|                    | <i>Microcystis novacekii</i>    | CHAB1444        | KJ818201               |
|                    | <i>Microcystis flosaquae</i>    | CHAB4385        | KJ818197               |
|                    | <i>Microcystis wesenbergii</i>  | NRERC216        | MK972444               |
|                    | <i>Microcystis botrys</i>       | CHAB2169        | KJ818206               |
|                    | <i>Microcystis aeruginosa</i>   | LMECYA137       | LMECYA137              |
|                    | <i>Microcystis aeruginosa</i>   | PCC7806         | KF286992               |

|                              |                                      |            |          |
|------------------------------|--------------------------------------|------------|----------|
|                              | <i>Microcystis aeruginosa</i>        | PCC7820    | U40339   |
|                              | <i>Microcystis wesenbergii</i>       | VN451      | AB666079 |
|                              | <i>Microcystis ichthyoblabe</i>      | TAC48      | AB012338 |
|                              | <i>Sphaerocavum brasiliense</i>      | CCIBt3179  | KY460551 |
|                              | <i>Sphaerocavum brasiliense</i>      | CCIBt3316  | KY460550 |
|                              | <i>Microcystis novacekii</i>         | MCYSCH01   | EU541973 |
|                              | <i>Microcystis panniformis</i>       | MCYSOB06   | EU541974 |
|                              | <i>Microcystis aeruginosa</i>        | KSUWH1     | KT807476 |
|                              | <i>Microcystis aeruginosa</i>        | MCYSLB02   | EU541971 |
|                              | <i>Microcystis novacekii</i>         | BA005      | KX423683 |
|                              | <i>Microcystis botrys</i>            | TAMB1      | MT039004 |
|                              | <i>Microcystis viridis</i>           | BKPCS60    | MW383698 |
|                              | <i>Microcystis viridis</i>           | NIES102    | AP019314 |
|                              | <i>Microcystis viridis</i>           | NIES102    | DQ648027 |
|                              | <i>Microcystis viridis</i>           | TAUMAC1810 | MN062681 |
|                              | <i>Microcystis bengalensis</i>       | VN486      | AB666082 |
|                              | <i>Microcystis flosaquae</i>         | NRERC207   | MK972439 |
|                              | <i>Microcystis aeruginosa</i>        | NRERC214   | MK972445 |
|                              | <i>Microcystis pseudofilamentosa</i> | VN511      | AB666084 |
|                              | <i>Microcystis wesenbergii</i>       | NIES107    | DQ648028 |
|                              | <i>Microcystis aeruginosa</i>        | NIES90     | DQ648026 |
|                              | <i>Microcystis viridis</i>           | NIES1058   | DQ648029 |
|                              | <i>Microcystis aeruginosa</i>        | BACA0148   | MT176750 |
|                              | <i>Microcystis viridis</i>           | NIES102    | U40332   |
|                              | <i>Microcystis wesenbergii</i>       | NIES107    | U40333   |
| <i>Cyanoarbor violascens</i> | <i>Cyanoarbor violascens</i>         | C1         | KU318400 |
|                              | <i>Cyanoarbor violascens</i>         | Z5         | KU318399 |
|                              | <i>Cyanoarbor violascens</i>         | C5         | KU318402 |
|                              | <i>Cyanoarbor violascens</i>         | C2         | KU318401 |
| <i>Chalicogloea 1</i>        | <i>Chalicogloea cavernicola</i>      | CCALA975   | JQ967037 |
|                              | <i>Chalicogloea cavernicola</i>      |            | NR177668 |
|                              | <i>Chalicogloea</i> sp.              | BACA0589   | OM732250 |
| <i>Chalicogloea 2</i>        | <i>Chalicogloea</i> sp.              | M64187     | OP323106 |
|                              | <i>Chalicogloea</i> sp.              | M64187     | OP323101 |
|                              | <i>Chalicogloea</i> sp.              | M64187     | OP323092 |
| <i>Gloeotheca</i>            | <i>Gloeotheca tepidariorum</i>       | PCC6909    | MF781034 |
|                              | <i>Gloeotheca tepidariorum</i>       | CCALA1112  | MF780994 |
|                              | <i>Gloeotheca membranacea</i>        | PCC6501    | MF781056 |
|                              | <i>Gloeotheca samoensis</i>          | SERB20     | KM982569 |
|                              | <i>Gloeotheca aequatorialis</i>      | SAG36.87   | MF781064 |
|                              | <i>Gloeotheca bryophila</i>          | HA4964KK2  | MH481819 |
| <i>Radiocystis</i>           | <i>Radiocystis</i> sp.               | JJ303      | AM710389 |
|                              | <i>Radiocystis geminata</i>          | TAUMAC1214 | OL310656 |
| <i>Woronichinia</i>          | <i>Woronichinia</i> sp.              | T5         | JN172622 |

|                                     |                                         |            |          |
|-------------------------------------|-----------------------------------------|------------|----------|
|                                     | <i>Woronichinia naegeliana</i>          | 0LE35S01   | AJ781043 |
| <i>Snowella</i>                     | <i>Snowella</i> sp.                     | CHAB6606   | MN796298 |
|                                     | <i>Snowella litoralis</i>               | 1LT47S05   | AJ781041 |
|                                     | <i>Snowella rosea</i>                   |            | AJ781042 |
| <i>Merismopedi</i>                  | <i>Merismopedia punctata</i>            | BACA0609   | OM732253 |
|                                     | <i>Merismopedia glauca</i>              | CCAP1448.3 | HF678499 |
| <i>Synechocystis</i>                | <i>Synechocystis</i> sp.                | PCC6803    | AY224195 |
|                                     | <i>Synechocystis</i> sp.                | PCC6714    | AB041937 |
| <i>Aphanothece</i>                  | <i>Aphanothece sacrum</i>               |            | AB116658 |
|                                     | <i>Aphanothece sacrum</i>               | FPU3       | LC229081 |
|                                     | <i>Aphanothece microscopica</i>         | CCY153     | FR873836 |
| <i>Neochroococcus gongqingensis</i> | <i>Neochroococcus gongqingensis</i>     | CHAB4018   | MT011391 |
|                                     | <i>Neochroococcus gongqingensis</i>     | CHAB4018   | MT011392 |
| <i>Inacoccus carmineus</i>          | <i>Inacoccus carmineus</i>              | CCIBt3475  | MF072349 |
|                                     | <i>Inacoccus carmineus</i>              | CCIBt3411  | MF072347 |
| <i>Chroococcus</i>                  | <i>Chroococcus turgidus</i>             | CCIBt3508  | MF072352 |
|                                     | <i>Chroococcus turgidus</i>             | KANI0      | MW040530 |
|                                     | <i>Chroococcus turgidus</i>             | AICB61     | KJ746515 |
|                                     | <i>Chroococcus minutus</i>              | CCALA55    | GQ375047 |
|                                     | <i>Chroococcus subviolaceus</i>         | CCIBt3549  | MF072353 |
| <i>Pleurocapsa</i>                  | <i>Pleurocapsa minor</i>                | SAG4.99    | AJ344564 |
|                                     | <i>Pleurocapsa fuliginosa</i>           | HA4302MV1  | JN385285 |
| <i>Cryptococcum</i>                 | <i>Cryptococcum brasiliense</i>         | CCIBt3410  | MF072345 |
|                                     | <i>Cryptococcum komarkovae</i>          | CCALA54    | MF072346 |
| <i>Geminocystis</i>                 | <i>Geminocystis herdmanii</i>           | PCC6308    | AB039001 |
|                                     | <i>Geminocystis</i> sp.                 | CHAB6541   | MH094654 |
| <i>Cyanobacterium</i>               | <i>Cyanobacterium aponinum</i>          | HG3        | KY172946 |
|                                     | <i>Cyanobacterium aponinum</i>          | PCC10605   | NR102443 |
|                                     | <i>Cyanobacterium stanieri</i>          | PCC7202    | AM258981 |
| <i>Anagnostidinema</i>              | <i>Anagnostidinema carotinosum</i>      | JR21       | KT315945 |
|                                     | <i>Anagnostidinema pseudacutissimum</i> | CCALA150   | KT315940 |
|                                     | <i>Anagnostidinema pseudacutissimum</i> | JR16       | KT315936 |
| <i>Wilmottia</i>                    | <i>Wilmottia murrayi</i>                | FBCCA402   | MN473878 |
|                                     | <i>Wilmottia murrayi</i>                | FBCCA401   | MN473877 |
|                                     | <i>Wilmottia murrayi</i>                | KGI28      | HQ873481 |
|                                     | <i>Wilmottia stricta</i>                | 16PC       | KY288986 |
|                                     | <i>Wilmottia stricta</i>                | 31PC       | KY288996 |
|                                     | <i>Wilmottia koreana</i>                | FBCCA812   | MN473879 |
| <i>Cephalothrix</i>                 | <i>Cephalothrix lacustris</i>           | CCIBt3261  | NR137272 |
|                                     | <i>Cephalothrix komarekiana</i>         | SAG75.79   | KJ994517 |
| <i>Ramsaria</i>                     | <i>Ramsaria avicenna</i>                | SMS12C     | MF348315 |

|                                   |                                       |              |          |
|-----------------------------------|---------------------------------------|--------------|----------|
|                                   | <i>Ramsaria avicenna</i>              | SMS12C       | MF348316 |
|                                   | <i>Ramsaria avicenna</i>              | SMS12C       | MF348317 |
| <i>Coleofasciculus</i>            | <i>Coleofasciculus chthonoplastes</i> | SAG2209      | EF654055 |
|                                   | <i>Coleofasciculus chthonoplastes</i> | WW12         | EF654060 |
| <i>Pycnacronema</i>               | <i>Pycnacronema edaphica</i>          | CATCA7       | MT311244 |
|                                   | <i>Pycnacronema conicum</i>           | 7PC          | MF581656 |
|                                   | <i>Pycnacronema caatingensis</i>      | CATCC2       | MT311243 |
|                                   | <i>Pycnacronema arboriculum</i>       | 41PC         | MF581657 |
|                                   | <i>Pycnacronema savannensis</i>       | 49PC         | MF581663 |
|                                   | <i>Pycnacronema marmoreum</i>         | 42PC         | MF581658 |
|                                   | <i>Pycnacronema rubrum</i>            | 43PC         | MF581659 |
|                                   | <i>Pycnacronema brasiliensis</i>      | 45PC         | MF581661 |
| <i>Gracilinea arenicola</i>       | <i>Gracilinea arenicola</i>           | CATCB9       | MT311246 |
|                                   | <i>Gracilinea arenicola</i>           | CATCC10      | MT311245 |
| <i>Jacksonvillea apiculata</i>    | <i>Jacksonvillea apiculata</i>        | UPOC77b      | KX236194 |
|                                   | <i>Jacksonvillea apiculata</i>        | UPOC77b      | KX236196 |
|                                   | <i>Jacksonvillea apiculata</i>        | UPOC77b      | KX236195 |
| <i>Desertifilum</i>               | <i>Desertifilum salkalinema</i>       | CHAB7200     | KR269853 |
|                                   | <i>Desertifilum tharense</i>          | UAMCS02      | MK424816 |
| <i>Konicacronema caatingensis</i> | <i>Konicacronema caatingensis</i>     | CATCB6       | MT311249 |
|                                   | <i>Konicacronema caatingensis</i>     | CATCB1       | MT311248 |
| <i>Crinalium</i>                  | <i>Crinalium epipsammum</i>           | SAG22.89     | AB115964 |
|                                   | <i>Crinalium magnum</i>               | SAG34.87     | AB115965 |
| <i>Cyanothece</i>                 | <i>Cyanothece aeruginosa</i>          | SAG87.79     | MF781042 |
|                                   | <i>Cyanothece aeruginosa</i>          | SAG87.79     | MF781041 |
|                                   | <i>Cyanothece svehlovae</i>           | NIVACYA258 1 | MF781048 |
|                                   | <i>Cyanothece svehlovae</i>           | NIVACYA258 1 | MF781043 |
|                                   | <i>Cyanothece svehlovae</i>           | NIVACYA258 1 | MF781047 |
| <i>Laspinema thermale</i>         | <i>Laspinema thermale</i>             | HKS5         | MF360989 |
|                                   | <i>Laspinema thermale</i>             | HKS5         | MF360988 |

---
